# Supplementary material for: Slow magnetic relaxation of a S = 1/2 copper(ii)-substituted Keggin-type silicotungstate
Source: Royal Society of Chemistry journal article supplement (doi:10.1039/d2dt03999k), 2023-01-01
Supplement: d2dt03999k1.pdf [file d2dt03999k1.pdf]

Electronic Supplementary Information

Slow magnetic relaxation of a  $S=1/2$  copper(II)-substituted  
Keggin-type silicotungstate

Toshiharu Ishizaki, Tomoji Ozeki

Department of Chemistry, College of Humanities and Sciences, Nihon  
University, 3-25-40 Sakurajosui, Setagaya-ku, Tokyo 156-8550, Japan

## Contents

Fig. S1 Infrared absorption spectrum of **1**.

Fig. S2 Powder X-ray diffraction pattern of **1**.

Fig. S3 Continuous-wave X-band electron spin resonance spectrum of  $\text{K}_6[\text{SiW}_{11}\text{O}_{39}\text{Cu}(\text{H}_2\text{O})] \cdot 13\text{H}_2\text{O}$  measured at room temperature.

Fig. S4 Magnetization ( $M$ )- magnetic field ( $\mu_0 H$ ) plot of **1** at measured 1.8 K.

Fig. S5 The  $\chi' - \chi''$  (Cole-Cole) plots, and fitting curves, for **dil.1** measured at 1.8 K in the indicated fields  $H_{\text{dc}}$  (dots).

Table S1 Fitting parameters used in the generalized Debye model of **dil.1** at 1.8 K

Fig. S6 The  $\chi' - \chi''$  (Cole-Cole) plots for **dil.1** in a field of  $H_{\text{dc}} = 3000$  Oe at the indicated temperatures.

Table S2 Fitting parameters used in the generalized Debye model of **dil.1** measured in a field of  $H_{\text{dc}} = 3000$  Oe

Fig. S7 The (a) in-phase ( $\chi'$ ) and (b) out-of-phase ( $\chi''$ ) magnetic susceptibilities of **1** at different AC frequencies measured at 1.8 K in the indicated applied static magnetic fields ( $H_{\text{dc}}$ ).

Fig. S8 The (a) in-phase ( $\chi'$ ) and (b) out-of-phase ( $\chi''$ ) magnetic susceptibilities of **1** in an applied field of  $H_{\text{dc}}$  of 3000 Oe at the indicated temperatures.

Fig. S9 The  $\chi' - \chi''$  (Cole-Cole) plots, and fitting curves (lines), of **1** at 1.8 K in the indicated fields  $H_{\text{dc}}$  (dots).

Table S3 Fitting parameters of used in the generalized Debye model of **1** measured at 1.8 K

Fig. S10 The  $\chi' - \chi''$  (Cole-Cole) plots of **1** in  $H_{\text{dc}} = 3000$  Oe at indicated temperatures (dots) and fitting curves (lines).

Table S4 Fitting parameters used in the generalized Debye model of **1** measured in a field of  $H_{\text{dc}} = 3000$  Oe

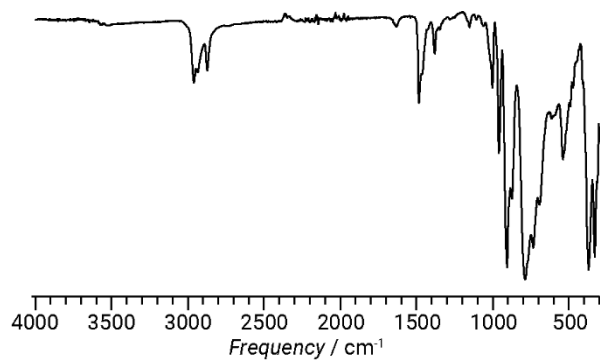

Fig. S1 Infrared absorption spectrum of **1**.

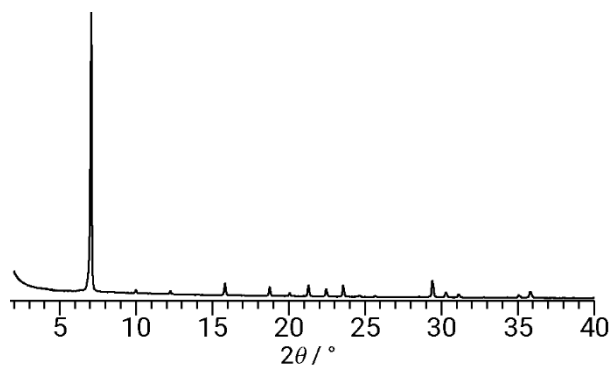

Fig. S2 Powder X-ray diffraction pattern of **1**.

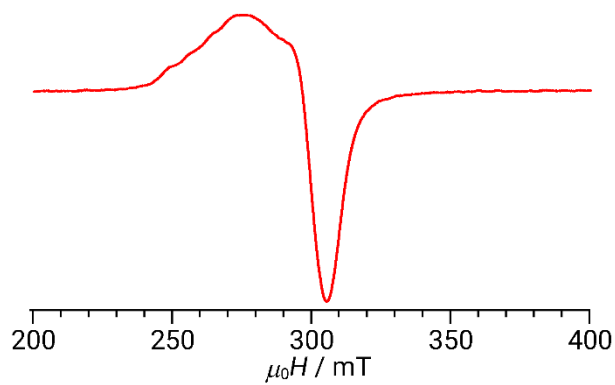

Fig. S3 Continuous-wave X-band electron spin resonance spectrum of  $\text{K}_6[\text{SiW}_{11}\text{O}_{39}\text{Cu}(\text{H}_2\text{O})] \cdot 13\text{H}_2\text{O}$  measured at room temperature.

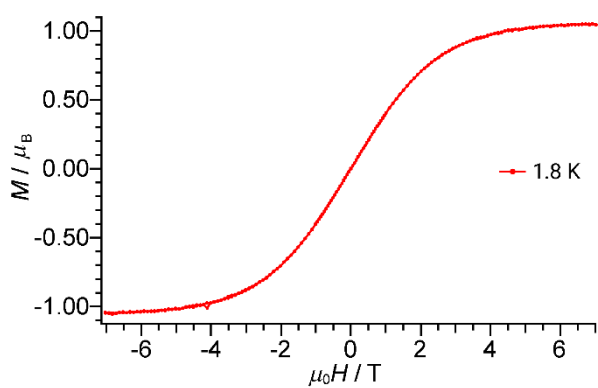

Fig. S4 Magnetization ( $M$ )- magnetic field ( $\mu_0 H$ ) plot of **1** at measured 1.8 K.

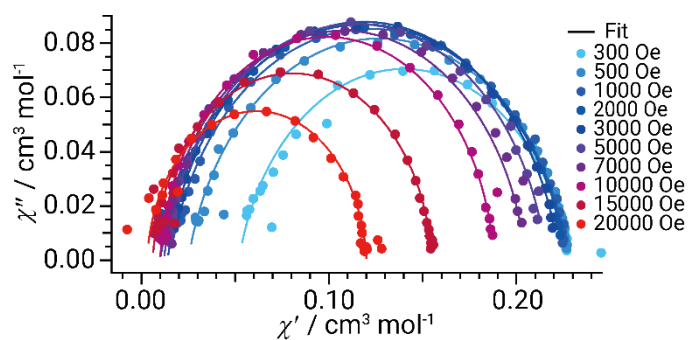

Fig. S5 The  $\chi' - \chi''$  (Cole-Cole) plots, and fitting curves, for **dil.1** measured at 1.8 K in the indicated fields  $H_{dc}$  (dots).

Table S1 Fitting parameters used in the generalized Debye model of **dil.1** at 1.8 K

| $\mu_0 H / \text{Oe}$ | $\chi_T / \text{cm}^3 \text{mol}^{-1}$ | $\chi_s / \text{cm}^3 \text{mol}^{-1}$ | $\alpha$ | $\tau / \text{s}$     |
|-----------------------|----------------------------------------|----------------------------------------|----------|-----------------------|
| 300                   | 0.228                                  | 0.052                                  | 0.14     | $1.70 \times 10^{-2}$ |
| 500                   | 0.229                                  | 0.025                                  | 0.14     | $2.20 \times 10^{-2}$ |
| 1000                  | 0.228                                  | 0.015                                  | 0.14     | $3.10 \times 10^{-2}$ |
| 2000                  | 0.227                                  | 0.010                                  | 0.14     | $5.00 \times 10^{-2}$ |
| 3000                  | 0.223                                  | 0.014                                  | 0.11     | $7.00 \times 10^{-2}$ |
| 5000                  | 0.216                                  | 0.012                                  | 0.10     | $9.20 \times 10^{-2}$ |
| 7000                  | 0.205                                  | 0.010                                  | 0.09     | $9.00 \times 10^{-2}$ |
| 10000                 | 0.188                                  | 0.010                                  | 0.05     | $6.40 \times 10^{-2}$ |
| 15000                 | 0.155                                  | 0.006                                  | 0.05     | $2.30 \times 10^{-2}$ |
| 20000                 | 0.120                                  | 0.003                                  | 0.04     | $8.00 \times 10^{-3}$ |

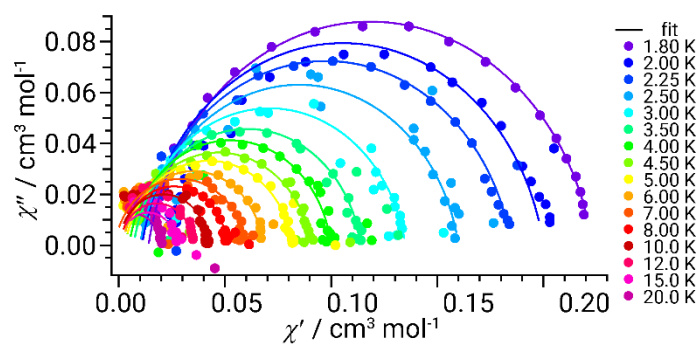

Fig. S6 The  $\chi' - \chi''$  (Cole-Cole) plots for **dil.1** in a field of  $H_{dc} = 3000$  Oe at the indicated temperatures.

Table S2 Fitting parameters used in the generalized Debye model of **dil.1** measured in a field of  $H_{dc} = 3000$  Oe

| $T / K$ | $\chi_T / \text{cm}^3 \text{mol}^{-1}$ | $\chi_S / \text{cm}^3 \text{mol}^{-1}$ | $\alpha$ | $\tau / s$            |
|---------|----------------------------------------|----------------------------------------|----------|-----------------------|
| 1.80    | 0.223                                  | 0.014                                  | 0.11     | $7.00 \times 10^{-2}$ |
| 2.00    | 0.200                                  | 0.011                                  | 0.11     | $5.80 \times 10^{-2}$ |
| 2.25    | 0.185                                  | 0.010                                  | 0.12     | $4.80 \times 10^{-2}$ |
| 2.50    | 0.160                                  | 0.010                                  | 0.11     | $3.50 \times 10^{-2}$ |
| 3.00    | 0.135                                  | 0.007                                  | 0.11     | $2.30 \times 10^{-2}$ |
| 3.50    | 0.114                                  | 0.007                                  | 0.10     | $1.70 \times 10^{-2}$ |
| 4.00    | 0.091                                  | 0.003                                  | 0.12     | $1.07 \times 10^{-2}$ |
| 5.00    | 0.082                                  | 0.003                                  | 0.11     | $8.50 \times 10^{-3}$ |
| 6.00    | 0.068                                  | 0.002                                  | 0.08     | $5.60 \times 10^{-3}$ |
| 7.00    | 0.060                                  | -0.002                                 | 0.11     | $4.00 \times 10^{-3}$ |
| 8.00    | 0.051                                  | 0.001                                  | 0.05     | $3.20 \times 10^{-3}$ |
| 10.00   | 0.042                                  | 0.0001                                 | 0.03     | $1.80 \times 10^{-3}$ |
| 12.00   | 0.035                                  | 0.001                                  | 0.02     | $1.50 \times 10^{-3}$ |
| 15.00   | 0.027                                  | 0.001                                  | 0.01     | $8.30 \times 10^{-4}$ |
| 20.00   | 0.020                                  | -0.005                                 | 0.02     | $3.20 \times 10^{-4}$ |

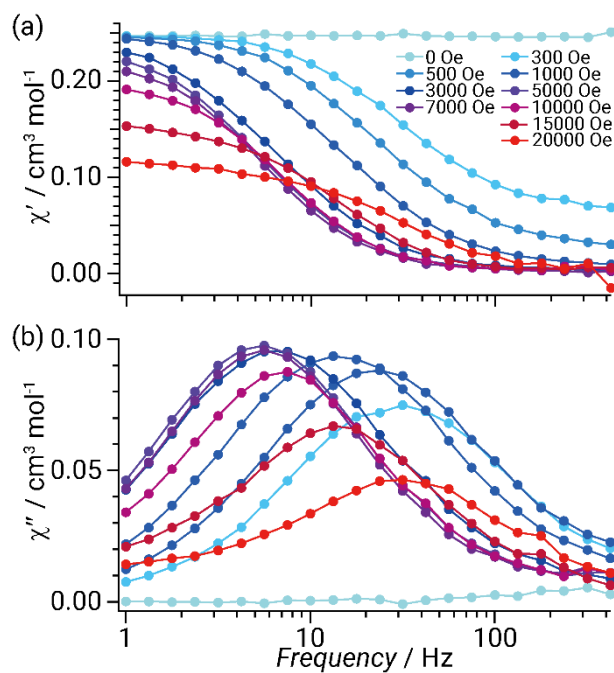

Fig. S7 The (a) in-phase ( $\chi'$ ) and (b) out-of-phase ( $\chi''$ ) magnetic susceptibilities of **1** at different AC frequencies measured at 1.8 K in the indicated static magnetic fields ( $H_{dc}$ ).

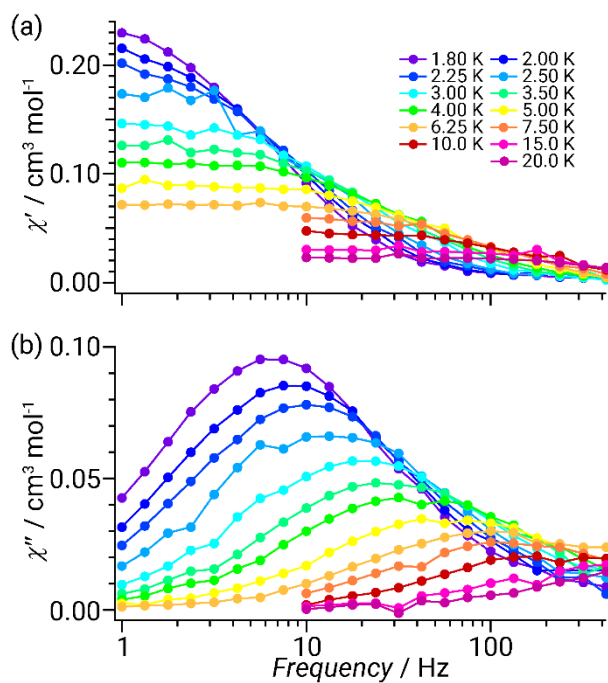

Fig. S8 The (a) in-phase ( $\chi'$ ) and (b) out-of-phase ( $\chi''$ ) magnetic susceptibilities of **1** in an applied field  $H_{dc}$  of 3000 Oe at the indicated temperatures.

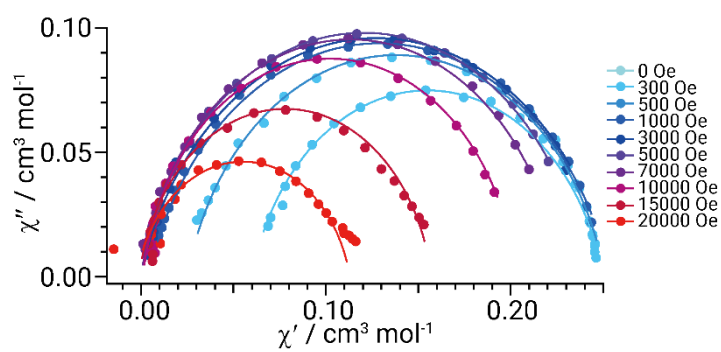

Fig. S9 The  $\chi' - \chi''$  (Cole-Cole) plots, and fitting curves (lines), of **1** at 1.8 K in the indicated fields  $H_{dc}$  (dots).

Table S3 Fitting parameters used in the generalized Debye model of **1** measured at 1.8 K

| $\mu_0 H / \text{Oe}$ | $\chi_T / \text{cm}^3 \text{mol}^{-1}$ | $\chi_S / \text{cm}^3 \text{mol}^{-1}$ | $\alpha$ | $\tau / \text{s}$     |
|-----------------------|----------------------------------------|----------------------------------------|----------|-----------------------|
| 300                   | 0.250                                  | 0.06                                   | 0.15     | $5.20 \times 10^{-3}$ |
| 500                   | 0.251                                  | 0.025                                  | 0.15     | $6.80 \times 10^{-3}$ |
| 1000                  | 0.254                                  | 0.004                                  | 0.18     | $1.10 \times 10^{-2}$ |
| 3000                  | 0.255                                  | -0.0005                                | 0.18     | $2.40 \times 10^{-2}$ |
| 5000                  | 0.241                                  | 0.0001                                 | 0.13     | $3.00 \times 10^{-2}$ |
| 7000                  | 0.227                                  | 0.0001                                 | 0.11     | $2.80 \times 10^{-2}$ |
| 10000                 | 0.203                                  | 0.001                                  | 0.09     | $2.30 \times 10^{-2}$ |
| 15000                 | 0.152                                  | -0.006                                 | 0.10     | $1.20 \times 10^{-2}$ |
| 20000                 | 0.113                                  | -0.025                                 | 0.14     | $5.30 \times 10^{-3}$ |



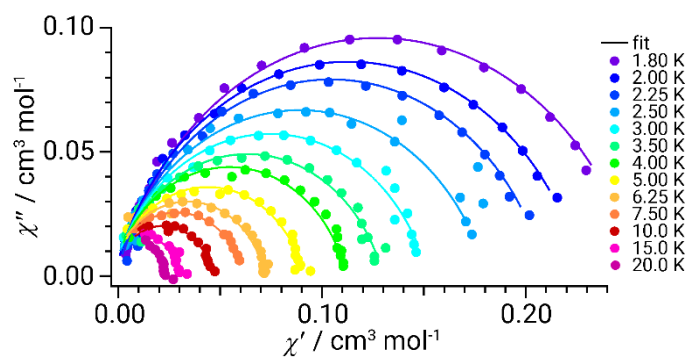

Fig. S10 The  $\chi' - \chi''$  (Cole-Cole) plots of **1** in  $H_{dc}=3000$  Oe at indicated temperatures (dots) and fitting curves (lines).

Table S4 Fitting parameters used in the generalized Debye model of **1** measured in a field of  $H_{dc} = 3000$  Oe

| $T / K$ | $\chi_T / \text{cm}^3 \text{mol}^{-1}$ | $\chi_S / \text{cm}^3 \text{mol}^{-1}$ | $\alpha$ | $\tau / s$            |
|---------|----------------------------------------|----------------------------------------|----------|-----------------------|
| 1.80    | 0.255                                  | -0.0005                                | 0.18     | $2.40 \times 10^{-2}$ |
| 2.00    | 0.228                                  | -0.002                                 | 0.18     | $1.92 \times 10^{-2}$ |
| 2.25    | 0.210                                  | -0.001                                 | 0.18     | $1.60 \times 10^{-2}$ |
| 2.50    | 0.181                                  | -0.003                                 | 0.20     | $1.20 \times 10^{-2}$ |
| 3.00    | 0.152                                  | -0.003                                 | 0.19     | $7.80 \times 10^{-3}$ |
| 3.50    | 0.130                                  | -0.003                                 | 0.19     | $5.50 \times 10^{-3}$ |
| 4.00    | 0.112                                  | -0.003                                 | 0.17     | $4.00 \times 10^{-3}$ |
| 5.00    | 0.091                                  | -0.003                                 | 0.17     | $2.70 \times 10^{-3}$ |
| 6.25    | 0.072                                  | -0.004                                 | 0.15     | $1.75 \times 10^{-3}$ |
| 7.50    | 0.062                                  | -0.005                                 | 0.17     | $1.25 \times 10^{-3}$ |
| 10.00   | 0.046                                  | -0.002                                 | 0.11     | $8.50 \times 10^{-4}$ |
| 15.00   | 0.0303                                 | -0.012                                 | 0.13     | $3.20 \times 10^{-4}$ |
| 20.00   | 0.0228                                 | -0.02                                  | 0.11     | $1.70 \times 10^{-4}$ |
